# Supplementary material
Source: HighWire-hosted journal article supplement (http://www.cmaj.ca/highwire/filestream/58469/field_highwire_adjunct_files/0/pg671.pdf)
Supplement: pg671.pdf [file pg671.pdf]

## PRODUCTION

**Production Manager • Gestionnaire de la production**  
Kathryn A. Freamo

**Production Assistants • Assistantes à la production**  
Nicole Barbeau, Lianne Johnsen, Carole Lalonde

## ADVERTISING • PUBLICITÉ

**Manager, Journal Advertising**  
**Gestionnaire, Annonces publicitaires**  
Beverley Kirkpatrick

**Coordinator, Display Advertising**  
**Coordonnatrice de la publicité**  
Nancy Pope

**Assistant Manager, Classified Advertising**  
**Gestionnaire adjointe, annonces classées**  
Deborah Rodd

613 731-9331, fax 613 565-7488  
advertising@cma.ca

For information on how to advertise  
in any of the CMA journals  
[www.cma.ca](http://www.cma.ca)

Pour savoir comment placer une annonce  
dans les revues publiées par l'AMC  
[www.cma.ca](http://www.cma.ca)

**Marketing and Advertising Sales**  
**Marketing et publicité**  
Keith Health Care Inc.

|                  |                  |
|------------------|------------------|
| <b>Toronto</b>   | <b>Montréal</b>  |
| 905 278-6700     | 514 624-6979     |
| 800 661-5004     | 877 761-0447     |
| fax 905 278-4850 | fax 514 624-6707 |

All prescription drug advertisements have been  
cleared by the Pharmaceutical Advertising Advisory  
Board.

Toutes les annonces de médicaments prescrits ont été  
approuvées par le Conseil consultatif de publicité  
pharmaceutique.

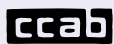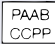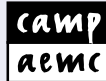

**ASSOCIATION  
MÉDICALE  
CANADIENNE**

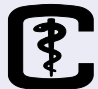

**CANADIAN  
MEDICAL  
ASSOCIATION**

**President • Président**  
Hugh Scully, MD CM, MSc

**Secretary General • Secrétaire général**  
Peter W. Vaughan, MD, MPH

**Director, Professional Development**  
**Directeur, Développement professionnel**  
Barbara Drew

**Manager, Publishing Services**  
**Gestionnaire, Services de publication**  
Jill Rafuse

**Publications Committee • Comité des publications**  
Stuart M. MacLeod, MD (Chairman • Président)  
Henry Haddad, MD  
Philip F. Hall, MD  
Barbara P. Lent, MD  
D'Arcy Lawrence Little, MD  
Jonathan L. Meakins, MD  
Mark Roper, MD  
W. Grant Thompson, MD

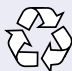

Printed on recycled paper • Imprimé sur papier recyclé

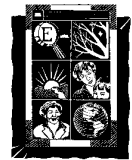

## Les soins dirigés aux États-Unis : la mer est houleuse

Une de nos jeunes collègues nous informe de New York, où elle a entrepris récemment une résidence en médecine interne, que son orientation a inclus une longue séance d'information sur l'assurance-maladie et les organisations de maintien de la santé (OMS). Elle est rentrée chez elle ce soir-là avec un plein sac de brochures et de formulaires d'inscription. Tout comme 160 millions d'Américains inscrits aux OMS, elle a fait face à un éventail ahurissant d'options, de franchises, de coûts et de petits caractères lorsqu'il s'est agi de choisir un fournisseur de soins dirigés. Or, maintenant que la plupart des OMS appartiennent à des investisseurs de Wall Street, la question la plus importante pour beaucoup de patients consiste à déterminer si le régime de soins dirigés qu'ils choisissent sera là lorsqu'ils en auront besoin.

Les OMS perdent des sommes faramineuses. Prenons l'exemple des Oxford Health Plans, organisation de soins dirigés appartenant à des investisseurs. Oxford, dont les investisseurs ont propulsé le cours de l'action à plus de 90 \$ US en 1997, a vu ce même cours dégringoler de 70 % à la fin de l'année.<sup>1</sup> Pendant de l'argent, Oxford a récemment déclaré à presque tous ses membres âgés que l'entreprise ne les assurerait plus et qu'ils devraient s'assurer ailleurs : s'ils y réussissaient.<sup>2</sup> Trouver un assureur ne présentera aucun problème pour notre jeune amie en bonne santé : les OMS aiment inscrire les personnes en bonne santé.<sup>3</sup> Les personnes âgées malades ont toutefois beaucoup plus de difficulté.

Il y a un fait peu connu et qu'on oublie commodément au sujet de l'assurance-maladie aux États-Unis, et c'est que le gouvernement en paie la majeure partie : sous forme de subventions fiscales fédérales à l'employeur et d'appui direct à l'assurance-maladie pour les personnes très pauvres (Medicaid) et les personnes âgées (Medicare), le gouvernement des États-Unis dépense 2500 \$ par habitant par année.<sup>4</sup> Cette dépense — qui représente une partie seulement du total des coûts des soins de santé aux États-Unis — dépasse le total des coûts des soins de santé (secteurs

public et privé) de tous les pays du monde sauf la Suisse.<sup>4</sup>

C'est pourquoi lorsque le gouvernement fédéral des États-Unis a voulu réduire son déficit, il a réduit les paiements du régime Medicare en modifiant la formule de remboursement aux OMS. Moins lucrative pour les OMS, la nouvelle formule était fondée non plus sur 95 % de la rémunération à l'acte dans la même région géographique, mais plutôt sur l'état de santé de chaque personne inscrite.

Face à la certitude, représentée par la baisse des revenus de Medicare, et à l'incertitude des coûts qu'entraîne le soin de patients âgés, les OMS appartenant à des investisseurs ont commencé à laisser tomber leurs clients âgés de Medicaid.

Il y a peu de fournisseurs de soins de santé appartenant à des investisseurs qui ont des chances de survivre sur cette mer houleuse. Comme les OMS appartenant à des investisseurs recherchent des eaux plus calmes et plus rentables, en laissant tomber quelque 400 000 patients (et électeurs) âgés de la classe moyenne,<sup>2</sup> le gouvernement a commencé à affecter des ressources aux moyens de sauvetage. Le Congrès des États-Unis est actuellement saisi d'une charte des droits des patients qui précise les services minimaux que les OMS doivent fournir et essaie de rétablir le fait que ce sont les médecins et non les comptables qui doivent pratiquer la médecine. C'est toutefois un peu comme essayer de renflouer le Titanic. Il devient de plus en plus probable que le gouvernement des États-Unis interviendra par des mesures de secours financier à l'intention des OMS appartenant à des investisseurs ou, comme l'espèrent beaucoup de nos collègues des États-Unis, qu'il finira par mettre en œuvre un régime d'assurance-maladie universelle.<sup>4</sup>

## Références

- Ginzberg E. The uncertain future of managed care. *N Engl J Med* 1999;340(2):144-6.
- Williams M. HMO cutbacks strand thousands of clients. *New York Times* 17 nov. 1998. Disponible : [www.nytimes.com](http://www.nytimes.com).
- Deber R, Gildiner A, Baranek P. Why not private health insurance? 1. Insurance made easy. *CMAJ* 1999;161(5):539-42.
- Woolhandler S, Himmelstein DU. When money is the mission: the high costs of investor-owned care. *N Engl J Med* 1999;341(6):445-6.
